# Supplementary material for: Speciation of iron in mouse liver during development, iron deficiency, IRP2 deletion and inflammatory hepatitis
Source: Royal Society of Chemistry journal article supplement (doi:10.1039/c4mt00215f), 2014-10-17

### Supplemental Information for Chakrabarti *et al.* 2014

#### Contents:

1. Details of mitochondria isolation
2. Table S1. Iron concentration of mice livers.
3. Figure S1. 0.05 T Mössbauer spectra of 1 wk and 16 wk mouse liver.
4. Figure S2. UV-vis spectra of livers isolated at different ages.
5. Figure S3. EPR spectra of packed liver homogenates from mice of different ages.
6. Table S2. Percentage spectral contribution and corresponding concentration the different spectral features obtained by Mössbauer and ICP-MS analysis.
7. Figure S4. 5K, 0.05 T Mössbauer spectrum of the brain from a 63 wk IRP2(-/-) mouse.

**1. Details of Mitochondria Isolation:** Mitochondria were isolated by combining the livers of 14 WT mice (both genders, with ages ranging from 3 – 6 months). Freshly isolated livers were suspended in 2-3 volumes of degassed mitochondria-isolation-buffer (MIB), consisting of 215 mM mannitol, 75 mM sucrose, 5 mM HEPES and 1 mM EGTA at pH 7.4. Cells were disrupted anaerobically by nitrogen cavitation at 800 psi for 15-20 min. The resulting extract was centrifuged at 2000 g for 5 min. The supernatant was centrifuged again, at 18000 g for 15 min. The pellet, containing crude mitochondria, was resuspended in a minimum volume of MIB and layered over discontinuous gradients of equal volumes of 17% and 35% histodenz in MIB. The layered assembly was centrifuged at 30000 rpm for 1 hr using a Beckman Optima L-90K ultracentrifuge with a SW 32 Ti rotor. Mitochondria were collected from the 17%-35% interface and were washed with MIB. Using the same rotor, they were packed into MB cups at 12,000 rpm for 1 hr, and then frozen in LN<sub>2</sub>.

**2. Table S1.** Iron concentration of mice livers. All values are given in  $\mu\text{M}$ .

| Age (d) | Number of samples (n) | Observed Liver Iron concentration (Not flushed) | Observed Liver Iron concentration (flushed) | Blood Iron concentration | Endogenous Liver Iron concentration | Reference  |
|---------|-----------------------|-------------------------------------------------|---------------------------------------------|--------------------------|-------------------------------------|------------|
| 0       | 12                    | $2300 \pm 640$                                  |                                             | $990 \pm 120$            | $1300 \pm 380$                      | This study |
| 1       | 1                     | 1820                                            |                                             | 760                      | 1060                                | This study |
| 7       | 4                     | $900 \pm 190$                                   |                                             | $270 \pm 90$             | $630 \pm 150$                       | 35         |
| 7       | 1                     | 540                                             |                                             | 190                      | 350                                 | This study |
| 14      | 4                     |                                                 | $440 \pm 60$                                | $90 \pm 40$              | $360 \pm 60$                        | 35         |
| 21      | 4                     |                                                 | $380 \pm 40$                                | $80 \pm 40$              | $300 \pm 40$                        | 35         |
| 21      | 1                     |                                                 | 380                                         | 130                      | 250                                 | This study |
| 21      | 1<br>Fe def.          |                                                 | 70                                          | 10                       | 60                                  | This study |
| 28      | 4                     |                                                 | $340 \pm 60$                                | $70 \pm 30$              | $270 \pm 60$                        | 35         |
| 35      | 4                     |                                                 | $440 \pm 120$                               | $40 \pm 40$              | $350 \pm 110$                       | 35         |
| 42      | 3                     |                                                 | $540 \pm 190$                               | $90 \pm 50$              | $430 \pm 160$                       | 35         |
| 42      | 1                     |                                                 | 550                                         | 110                      | 440                                 | This study |
| 49      | 2                     |                                                 | $560 \pm 50$                                | $110 \pm 60$             | $440 \pm 70$                        | 35         |
| 112     | 1                     | $3800 \pm 280$                                  |                                             |                          |                                     | This study |
| 443     | 1<br>IRP2(-/-)        |                                                 | 3900                                        | 590                      | 3300                                | This study |
| 773     | 1                     |                                                 | 710                                         | 160                      | 660                                 | This study |

3. **Figure S1.** 0.05 T Mössbauer spectra of 1 wk (A, B) and 16 wk (C, D) mouse liver. A & C were collected at 5 K. B and D were collected at 70 K. Near-flat base line of the 70 K spectra show that mouse livers did not contain significant levels of hemosiderin.

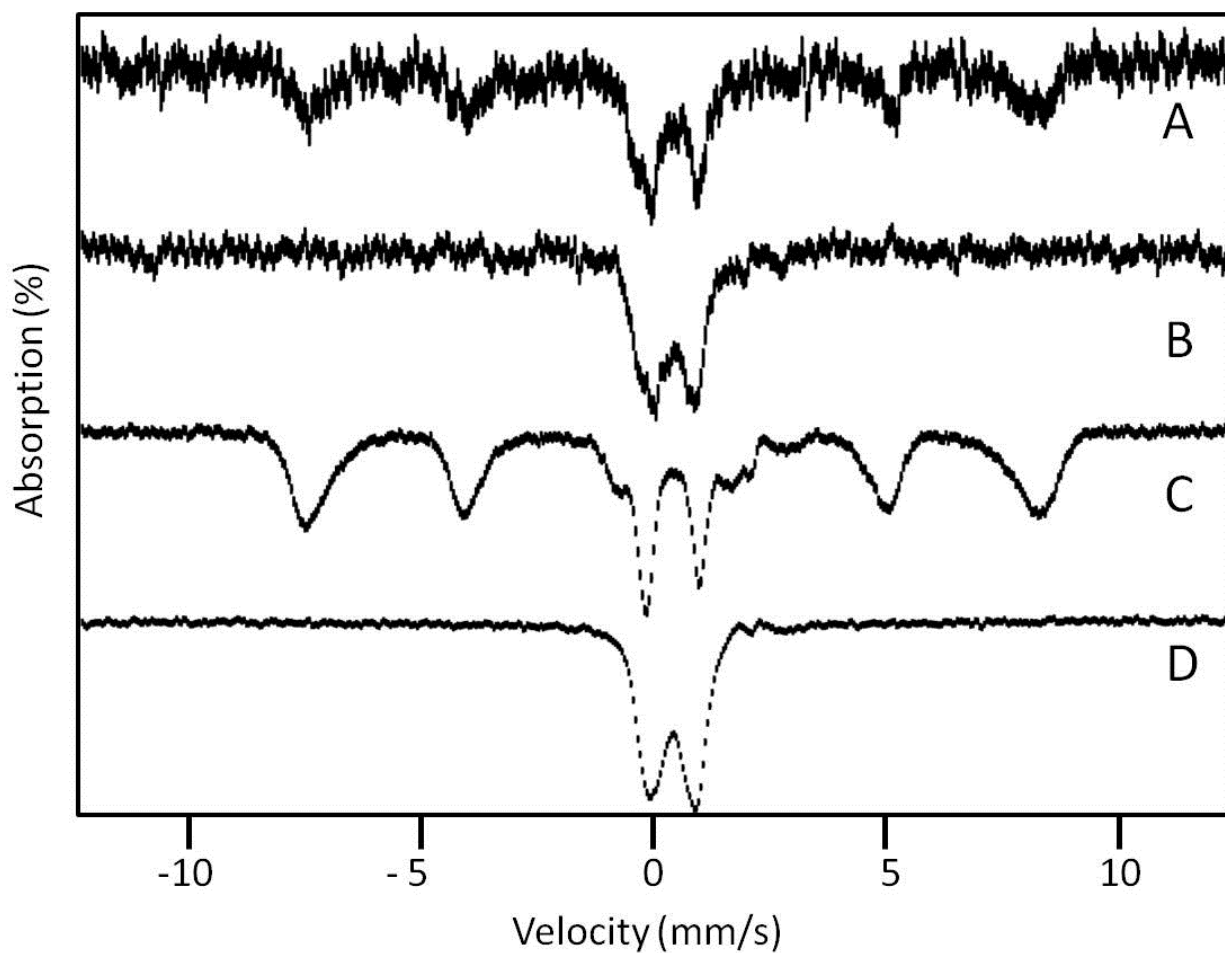

4. **Figure S2.** UV-vis spectra of livers isolated at different ages. **A**, 1 dy; **B**, 1 wk; **C**, 3 wk; **D**, 96 wk. Contribution due to hemoglobin has been removed.

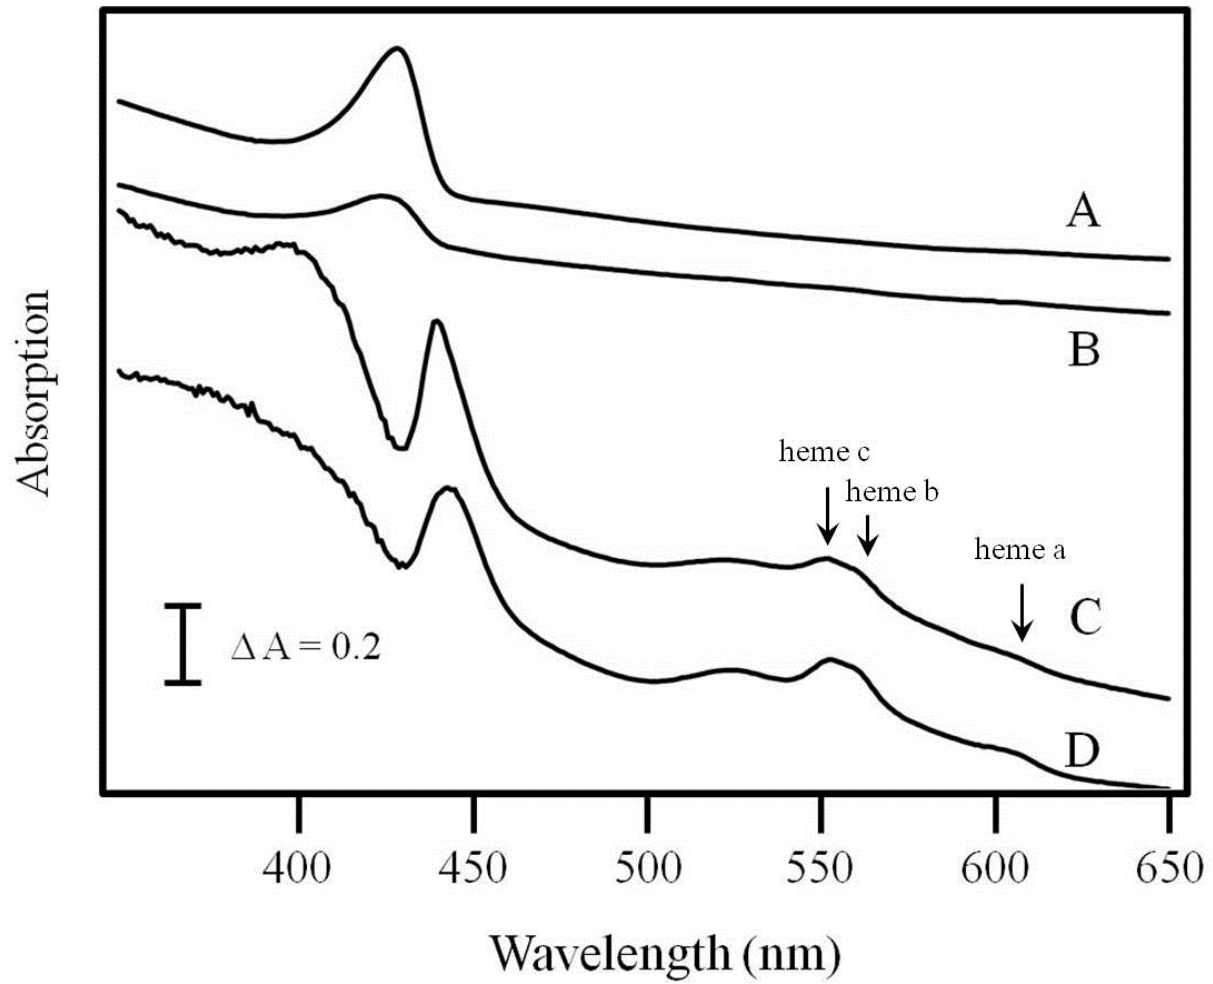

5. **Figure S3.** EPR spectra of packed liver homogenates from mice of different ages. **A**, 1 dy; **B**, 1 wk; **C**, 3 wk; **D**, 96 wk. Conditions: Temperature, 10 K; microwave frequency, 9.43 GHz; microwave power, 0.2 mW; modulation amplitude, 10 G.

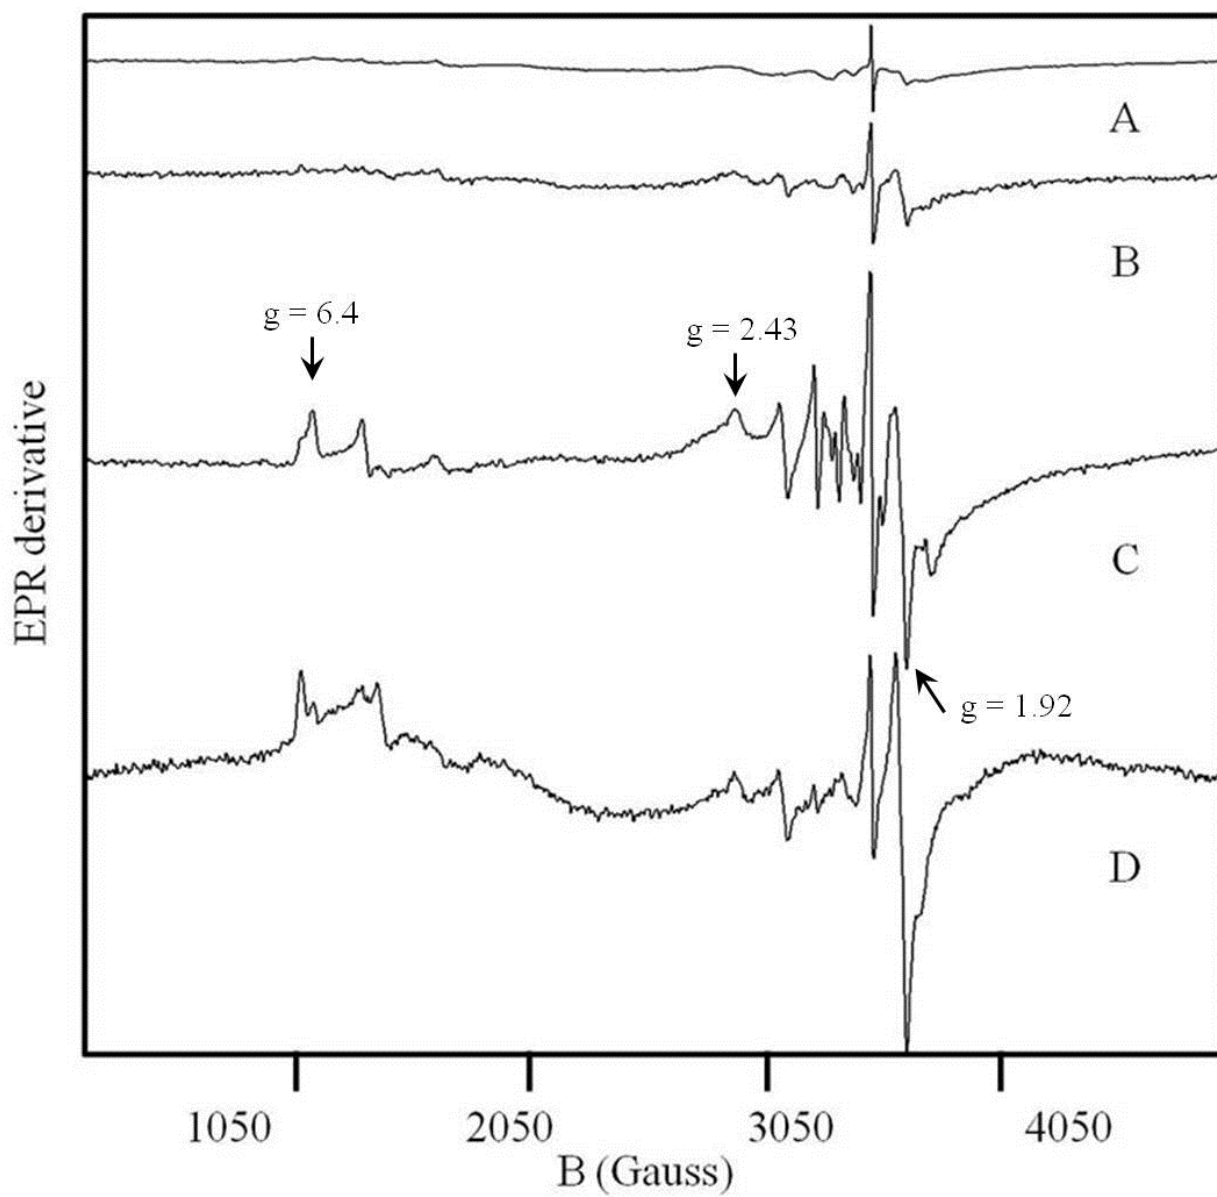

**6. Table S2.** Percentage spectral contribution and corresponding concentration the different spectral features obtained by Mössbauer and ICP-MS analysis. Values derived from Mössbauer analyses have an absolute estimated uncertainty of  $\pm 4\%$ .

|                  | Ferritin<br>%, [ $\mu\text{M}$ ] | C.D<br>%, [ $\mu\text{M}$ ] | NHHS<br>%, [ $\mu\text{M}$ ] | Total Fe<br>[ $\mu\text{M}$ ] | Total Mn<br>[ $\mu\text{M}$ ] |
|------------------|----------------------------------|-----------------------------|------------------------------|-------------------------------|-------------------------------|
| 1 dy             | 96, [1020]                       | 3, [30]                     | 0                            | 1060                          | 4                             |
| 1 wk             | 60, [210]                        | 30, [110]                   | 3, [10]                      | 350                           | 8                             |
| 3 wk             | < 20,<br>[< 50]                  | 70, [180]                   | 8, [20]                      | 250                           | 140                           |
| 3 wk<br>(Fe def) | 0-5, [0-3]                       | 80, [50]                    | 15, [10]                     | 60                            |                               |
| 6 wk             | 50, [220]                        | 40, [180]                   | 0-5, [0-20]                  | 440                           | 20                            |
| 96 wk            | 66, [430]                        | 26, [170]                   | 0-5, [0-40]                  | 660                           | 20                            |
| IRP 2(-/-)       | 95, [3200]                       | < 3,<br>[< 100]             | 0-1, [0-30]                  | 3330                          | 10                            |

7. **Figure S4.** 5K, 0.05 T Mössbauer spectrum of the brain from a 63 wk IRP2(-/-) mouse. The red line is a simulation with 68% and 22% spectral contribution due to ferritin and the CD respectively. Contribution due to blood (20% of the spectral intensity was removed). The line at ca. 0.7 mm/s is probably an artifact; the spectrum of a 15 wk IRP2(-/-) brain was very similar but did not include this line.

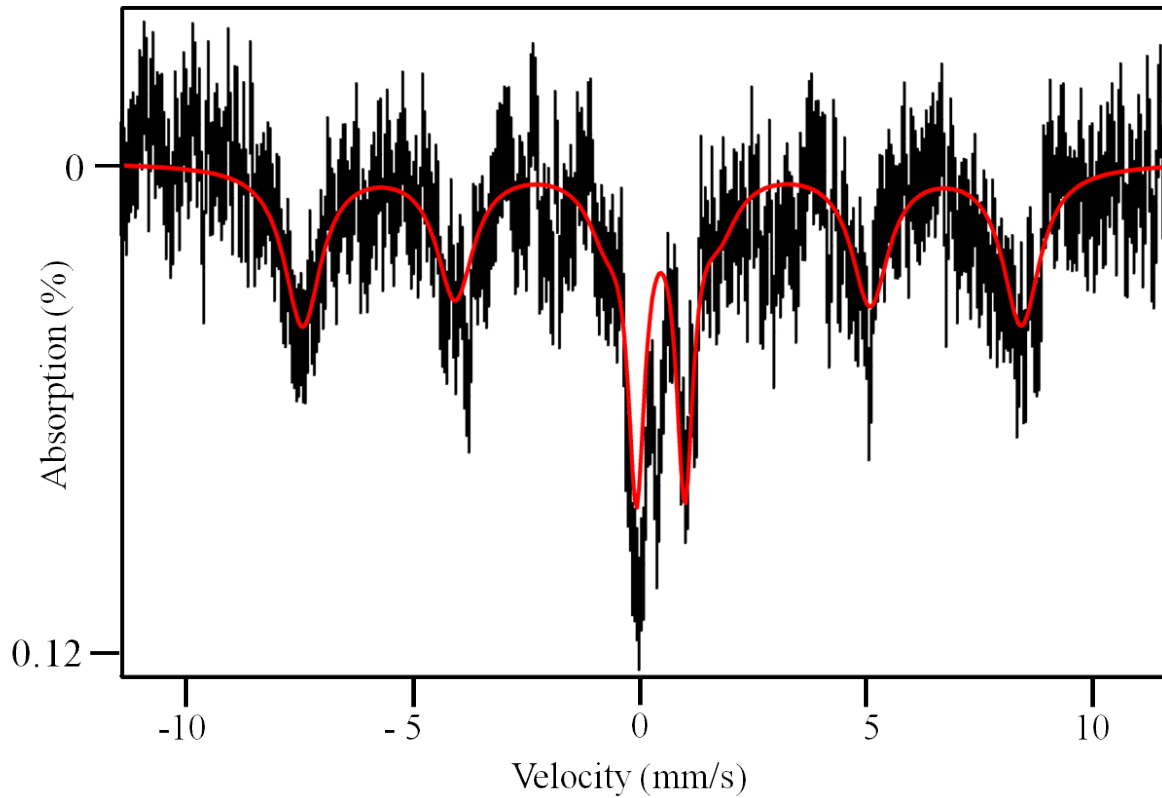

Supplement: c4mt00215f1.pdf [file c4mt00215f1.pdf]
